# Supplementary material
Source: PubMed Central journal article supplement (PMC5102067)
Supplement: NIHMS824783-supplement-Supp2.pdf [file NIHMS824783-supplement-Supp2.pdf]

## Table S2. n-PTEN peptides identified by LC-MS/MS

UniProt ID: P60484

Protein Description: Phosphatidylinositol 3,4,5-trisphosphate 3-phos

Coverage: 78.91%

# Unique peptides: 141

# PSMs: 284

| <u>Sequence</u>               | <u># PSMs</u> |
|-------------------------------|---------------|
| EPSNPEASSSTSVTPDVSDNEPDHYR    | 1             |
| ADNDKEYLVLTLLTK               | 9             |
| RYQEDGFDLDTYIYPNIIAmGFPAER    | 2             |
| TVEEPSNPEASSSTSVTPDVSDNEPDHYR | 2             |
| DKmFHFVWNTFFIPGPEETSEK        | 3             |
| VKIYSSNSGPTR                  | 2             |
| NHLDYRVPVALLFHK               | 8             |
| DDNHVAAIHcK                   | 2             |
| DTTSDPENEPFDEDQHTQITK         | 1             |
| HFWVNTFFIPGPEETSEK            | 3             |
| NDKEYLVLTLLTK                 | 4             |
| MFHFVWNTFFIPGPEETSEK          | 2             |
| SSTSVTPDVSDNEPDHYR            | 1             |
| NDLKANKDKANR                  | 2             |
| NPEASSSTSVTPDVSDNEPDHYR       | 1             |
| PENEPFDEDQHTQITKV             | 1             |
| DKkGVTIPSQR                   | 3             |
| DKEYLVLTLLTK                  | 2             |
| TVEEPsNPEASSSTSVTPDVSDNEPDHYR | 1             |
| EPFDEDQHTQITKV                | 3             |
| DEDQHTQITK                    | 3             |
| FDLDTYIYPNIIAmGFPAER          | 1             |
| DEDQHTQITKV                   | 3             |
| GDIKVEFFHK                    | 5             |
| EDKfM YFEFPQPLPVcGDIK         | 1             |
| DHNPPQLELIK                   | 2             |
| IPGPEETSEKVE                  | 1             |
| KGVTIPSQR                     | 3             |
| DNDKEYLVLTLLTK                | 1             |
| VSDNEPDHYR                    | 1             |
| EPFDEDQHTQITK                 | 3             |
| VAQYPFEDHNPPQLELIK            | 1             |
| DKKGVVTIPSQR                  | 1             |
| AQEALDFYGEVR                  | 14            |
| DEDQHTQITkV                   | 1             |
| LDLTYIYPNIIAmGFPAER           | 2             |
| IYSSNSGPTRR                   | 4             |
| GPEETSEKVE                    | 1             |
| VNTFFIPGPEETSEK               | 1             |
| FWVNTFFIPGPEETSEK             | 2             |
| DLDTYIYPNIIAmGFPAER           | 1             |
| PGPEETSEK                     | 3             |
| DIKVEFFHK                     | 4             |

|                        |   |
|------------------------|---|
| NHLDYRPVALL            | 5 |
| NHLDYRPVALLF           | 2 |
| FEFPQPLPVcGDIK         | 1 |
| VAQYPFEDHNPPQLEL       | 2 |
| IYSSNSGPTR             | 3 |
| TFFIPGPEETSEK          | 3 |
| EDDNHVAAIHcK           | 1 |
| FEDHNPPQL              | 1 |
| VAQYPFEDHNPPQLE        | 1 |
| YRPVALLFHK             | 1 |
| WVNTFFIPGPEETSEK       | 1 |
| FmYFEFPQPLPVcGDIK      | 3 |
| EPFDEDQHTQITkV         | 1 |
| YFSPNFKVK              | 1 |
| NHLDYRPVAL             | 6 |
| LYIYPNIIAmGFPAER       | 1 |
| EDHNPPQLEL             | 2 |
| PVALLFHK               | 1 |
| NDLKANKDK              | 1 |
| IYNLcAER               | 3 |
| IikEIVSR               | 2 |
| NDLKANK                | 1 |
| FIPGPEETSEKVE          | 2 |
| ADNDKEYLVLT            | 2 |
| DHNPPQLELIKPF          | 2 |
| FEDHNPPQ               | 1 |
| IIAmGFPAER             | 3 |
| NHLDYRPVA              | 4 |
| IPGPEETSEK             | 3 |
| VAQYPFEDHNPPQ          | 2 |
| PENEPFDEDQHTQITkV      | 1 |
| EPFDEDQHTQ             | 1 |
| YSSNSGPTR              | 1 |
| YPFEDHNPPQ             | 1 |
| NNIDDVVR               | 5 |
| LDYRPVALL              | 1 |
| HYDTAKF                | 1 |
| DHNPPQLE               | 2 |
| DTTSDPENEPFDEDQHTQITkV | 1 |
| YIYPNIIAmGFPAER        | 1 |
| DNEPDHYR               | 2 |
| KVEFFHK                | 1 |
| ADNDKEYL               | 2 |
| RYVYYYSYLLK            | 1 |
| GVTIPSQRR              | 2 |
| EFPQPLPVc              | 3 |
| DQHTQITKV              | 1 |
| DKmFHFVWNTF            | 1 |
| GVTIPSQR               | 5 |
| FFIPGPEETSEK           | 2 |
| NHLDYRP                | 3 |
| HLDYRPVAL              | 1 |

|                        |   |
|------------------------|---|
| YSSNSGPTRR             | 2 |
| EYLVLTLLK              | 2 |
| EDHNPPQL               | 2 |
| REDKf <sub>m</sub> YF  | 1 |
| DHNPPQLEL              | 3 |
| HLDYRPVA               | 1 |
| YFSPNFK                | 5 |
| DIKVEFF                | 1 |
| VEFFHKQNK              | 1 |
| HYDTakF                | 2 |
| NHLDYR                 | 1 |
| YVYYYSYLLK             | 1 |
| REDKf <sub>m</sub> YFE | 1 |
| DHNPPQL                | 2 |
| RYVYYYS                | 2 |
| SIcSIER                | 1 |
| RYQEDGF                | 1 |
| VTIPSQR                | 1 |
| SSNSGPTRR              | 1 |
| TQITkV                 | 1 |
| DYRPVAL                | 1 |
| HYDTAK                 | 1 |
| DK <sub>m</sub> FHFW   | 1 |
| LELIKPF                | 1 |
| DK <sub>m</sub> FHFWVN | 1 |
| REDk <sub>f</sub> mYF  | 1 |
| AYLLHR                 | 1 |
| FIPGPEETSEK            | 2 |
| LELIKPF <sub>c</sub>   | 1 |
| LEGVYR                 | 5 |
| LVLTLTK                | 1 |
| MFHFWVNTF              | 1 |
| EDHNPPQLE              | 1 |
| EPFDEDQH               | 1 |
| HFVNTF                 | 1 |
| EFQPLPV <sub>c</sub> G | 2 |
| YPNIIAm                | 1 |
| YSYLLK                 | 1 |
| DYRPVALL               | 1 |
| LDYRPVAL               | 1 |
| YRPVALLF               | 1 |
| DGFDLDTYIYPN           | 1 |
| DLDTYIYPN              | 1 |
| NDKEYLVL               | 1 |
| YRPVALL                | 1 |
| DIKVEF                 | 1 |
| TGV <sub>m</sub> IcAY  | 1 |
| LYIYPNIIAmG            | 1 |
| RYVYYY                 | 2 |
| DFYGEVR                | 1 |
| YRPVAL                 | 1 |
| EDKf <sub>m</sub> YF   | 1 |

### 5 from the WWP2 ubiquitylation experiment.

phatase and dual-specificity protein phosphatase PTEN OS=Homo sapiens GN=PTEN PE=1 SV=1 - [PTEN\_

|                                     | <u>Modifications</u> | <u>Xcorr score</u> | <u>Charge</u> | <u>MH+ [Da]</u> |
|-------------------------------------|----------------------|--------------------|---------------|-----------------|
|                                     |                      | 5.57               | 3             | 2817.20523      |
|                                     |                      | 5.54               | 2             | 1622.86931      |
| M21(Oxidation)                      |                      | 5.36               | 3             | 3223.56296      |
|                                     |                      | 4.89               | 3             | 3146.36643      |
| M3(Oxidation)                       |                      | 4.89               | 3             | 2702.25748      |
|                                     |                      | 4.69               | 3             | 1308.6912       |
|                                     |                      | 4.39               | 2             | 1722.94414      |
| C10(Carbamidomethyl)                |                      | 4.27               | 3             | 1279.58429      |
|                                     |                      | 3.98               | 3             | 2562.08017      |
|                                     |                      | 3.97               | 3             | 2165.04288      |
|                                     |                      | 3.88               | 2             | 1436.80254      |
|                                     |                      | 3.86               | 3             | 2443.14328      |
|                                     |                      | 3.85               | 2             | 2005.87273      |
| K8(GlyGly)                          |                      | 3.81               | 4             | 1615.81423      |
|                                     |                      | 3.79               | 3             | 2504.08445      |
|                                     |                      | 3.73               | 3             | 2026.93778      |
| K3(GlyGly)                          |                      | 3.72               | 3             | 1342.74176      |
|                                     |                      | 3.68               | 2             | 1322.76213      |
| S6(Phospho)                         |                      | 3.63               | 3             | 3226.32895      |
|                                     |                      | 3.59               | 2             | 1686.79875      |
|                                     |                      | 3.58               | 2             | 1214.56389      |
| M15(Oxidation)                      |                      | 3.57               | 2             | 2475.23418      |
|                                     |                      | 3.5                | 2             | 1313.63347      |
|                                     |                      | 3.49               | 3             | 1219.64673      |
| M5(Oxidation); C16(Carbamidomethyl) |                      | 3.45               | 3             | 2476.17203      |
|                                     |                      | 3.41               | 3             | 1303.70386      |
|                                     |                      | 3.3                | 2             | 1314.64311      |
|                                     |                      | 3.26               | 2             | 985.57866       |
|                                     |                      | 3.26               | 2             | 1551.83098      |
|                                     |                      | 3.23               | 3             | 1231.53339      |
|                                     |                      | 3.22               | 2             | 1587.726        |
|                                     |                      | 3.2                | 3             | 2138.10184      |
|                                     |                      | 3.18               | 3             | 1228.70084      |
|                                     |                      | 3.13               | 2             | 1397.67058      |
| K10(GlyGly)                         |                      | 3.13               | 2             | 1427.67717      |
| M13(Oxidation)                      |                      | 3.1                | 2             | 2213.13335      |
|                                     |                      | 3.07               | 3             | 1237.6276       |
|                                     |                      | 3.05               | 2             | 1104.5053       |
|                                     |                      | 3.05               | 2             | 1694.83306      |
|                                     |                      | 3.04               | 2             | 2027.98125      |
| M14(Oxidation)                      |                      | 2.99               | 2             | 2328.17583      |
|                                     |                      | 2.94               | 2             | 973.44719       |
|                                     |                      | 2.93               | 3             | 1162.62604      |

|                                     |      |   |            |
|-------------------------------------|------|---|------------|
|                                     | 2.92 | 3 | 1310.72449 |
|                                     | 2.91 | 3 | 1457.79691 |
| C10(Carbamidomethyl)                | 2.91 | 2 | 1646.83452 |
|                                     | 2.89 | 2 | 1896.91277 |
|                                     | 2.87 | 2 | 1081.52641 |
|                                     | 2.83 | 2 | 1481.71587 |
| C11(Carbamidomethyl)                | 2.82 | 3 | 1408.62632 |
|                                     | 2.81 | 2 | 1096.50566 |
|                                     | 2.79 | 2 | 1783.83843 |
|                                     | 2.78 | 3 | 1243.73114 |
|                                     | 2.78 | 2 | 1880.90764 |
| M2(Oxidation); C13(Carbamidomethyl) | 2.75 | 2 | 2103.98271 |
| K13(GlyGly)                         | 2.7  | 2 | 1800.83953 |
|                                     | 2.65 | 3 | 1129.60416 |
|                                     | 2.65 | 2 | 1197.63652 |
| M11(Oxidation)                      | 2.64 | 2 | 1985.01262 |
|                                     | 2.62 | 2 | 1191.55461 |
|                                     | 2.61 | 2 | 924.56798  |
|                                     | 2.61 | 3 | 1160.59082 |
| C5(Carbamidomethyl)                 | 2.6  | 2 | 1038.4937  |
| K3(GlyGly)                          | 2.59 | 3 | 1071.65247 |
|                                     | 2.58 | 2 | 917.46892  |
|                                     | 2.56 | 2 | 1461.71367 |
|                                     | 2.53 | 2 | 1280.6353  |
|                                     | 2.5  | 2 | 1547.82317 |
|                                     | 2.48 | 2 | 983.42229  |
| M4(Oxidation)                       | 2.47 | 2 | 1120.5822  |
|                                     | 2.44 | 2 | 1084.55315 |
|                                     | 2.43 | 2 | 1086.53227 |
|                                     | 2.4  | 2 | 1541.6917  |
| K16(GlyGly)                         | 2.39 | 3 | 2140.98117 |
|                                     | 2.39 | 2 | 1245.50249 |
|                                     | 2.38 | 2 | 968.44237  |
|                                     | 2.36 | 2 | 1243.54021 |
|                                     | 2.35 | 2 | 944.47911  |
|                                     | 2.35 | 2 | 1059.62273 |
|                                     | 2.34 | 2 | 881.41472  |
|                                     | 2.33 | 2 | 949.43804  |
| K22(GlyGly)                         | 2.33 | 3 | 2775.16312 |
| M9(Oxidation)                       | 2.3  | 2 | 1770.8936  |
|                                     | 2.3  | 2 | 1045.43279 |
|                                     | 2.3  | 2 | 934.51842  |
|                                     | 2.26 | 2 | 967.43559  |
|                                     | 2.26 | 3 | 1530.79282 |
|                                     | 2.25 | 2 | 1013.58428 |
| C9(Carbamidomethyl)                 | 2.24 | 2 | 1086.53166 |
|                                     | 2.22 | 2 | 1069.56352 |
| M3(Oxidation)                       | 2.19 | 2 | 1487.68132 |
|                                     | 2.17 | 2 | 857.48332  |
|                                     | 2.15 | 2 | 1380.67266 |
|                                     | 2.14 | 2 | 914.44768  |
|                                     | 2.13 | 2 | 1083.59429 |

|                                    |      |   |            |
|------------------------------------|------|---|------------|
|                                    | 2.08 | 2 | 1124.54436 |
|                                    | 2.07 | 2 | 1079.63164 |
|                                    | 2.03 | 2 | 949.4362   |
| M6(Oxidation)                      | 2.01 | 3 | 1151.52253 |
|                                    | 2    | 2 | 1062.52446 |
|                                    | 2    | 2 | 970.51024  |
|                                    | 2    | 2 | 902.44072  |
|                                    | 1.97 | 2 | 897.47331  |
| K6(GlyGly)                         | 1.96 | 3 | 1176.61475 |
|                                    | 1.96 | 2 | 995.45812  |
|                                    | 1.94 | 2 | 817.39488  |
|                                    | 1.91 | 2 | 1374.6989  |
| M6(Oxidation)                      | 1.91 | 2 | 1280.55828 |
|                                    | 1.88 | 2 | 820.39495  |
|                                    | 1.87 | 2 | 1013.47399 |
| C3(Carbamidomethyl)                | 1.86 | 2 | 864.42479  |
|                                    | 1.86 | 2 | 914.40044  |
|                                    | 1.86 | 2 | 800.46306  |
|                                    | 1.85 | 2 | 961.48058  |
| K5(GlyGly)                         | 1.81 | 2 | 803.46227  |
|                                    | 1.8  | 2 | 833.45043  |
|                                    | 1.8  | 2 | 734.34709  |
| M3(Oxidation)                      | 1.79 | 2 | 1026.45403 |
|                                    | 1.77 | 2 | 859.53203  |
| M3(Oxidation)                      | 1.76 | 2 | 1239.56413 |
| K4(GlyGly); M6(Oxidation)          | 1.76 | 2 | 1265.5667  |
|                                    | 1.74 | 2 | 772.44628  |
|                                    | 1.73 | 2 | 1233.59917 |
| C8(Carbamidomethyl)                | 1.72 | 2 | 1019.56188 |
|                                    | 1.71 | 2 | 736.39842  |
|                                    | 1.69 | 2 | 787.52953  |
|                                    | 1.69 | 2 | 1228.56511 |
|                                    | 1.69 | 2 | 1078.47905 |
|                                    | 1.66 | 2 | 1016.39592 |
|                                    | 1.66 | 2 | 950.45317  |
| C9(Carbamidomethyl)                | 1.66 | 2 | 1143.54802 |
| M7(Oxidation)                      | 1.66 | 2 | 837.41808  |
|                                    | 1.65 | 2 | 786.44036  |
|                                    | 1.63 | 2 | 946.53618  |
|                                    | 1.61 | 2 | 946.5352   |
|                                    | 1.59 | 2 | 978.57909  |
|                                    | 1.56 | 2 | 1545.71318 |
|                                    | 1.55 | 2 | 1226.60039 |
|                                    | 1.54 | 2 | 993.52672  |
|                                    | 1.53 | 2 | 831.50902  |
|                                    | 1.53 | 2 | 750.40416  |
| M4(Oxidation); C6(Carbamidomethyl) | 1.53 | 2 | 930.4055   |
| M11(Oxidation)                     | 1.47 | 2 | 1384.7199  |
|                                    | 1.46 | 2 | 926.44078  |
|                                    | 1.46 | 2 | 885.41173  |
|                                    | 1.43 | 2 | 718.42443  |
| M5(Oxidation)                      | 1.43 | 2 | 995.41783  |

\_HUMAN]

**$\Delta M$  [ppm]**

-1.08  
3.49  
6.93  
-0.18  
-0.81  
0.39  
0.14  
-0.43  
1.96  
4.14  
2.06  
0.18  
-0.35  
-0.32  
1.42  
1.21  
-1.52  
4.15  
-1.35  
1.03  
-0.76  
3.08  
0.18  
-0.25  
6.29  
2.55  
0.53  
-0.29  
2.87  
-0.37  
-1.64  
4.71  
-0.03  
0.68  
0.71  
0.97  
-0.66  
-0.26  
3.41  
3.08  
7.6  
-0.14  
0.4

2.21  
4.73  
5.92  
0.02  
-0.81  
-0.04  
-0.8  
-0.16  
5.48  
0.09  
0.56  
-4.38  
-0.23  
0.06  
-0.83  
-3.81  
-7.95  
1.5  
0.15  
-9.65  
0.33  
0.21  
1.94  
-1.26  
0.93  
0.53  
0.16  
-0.28  
0.8  
-6.67  
1.37  
0.49  
-0.88  
1.89  
-0.55  
2.81  
-0.56  
0.65  
-8.42  
2.92  
-0.58  
4.14  
-1.2  
-4.12  
-0.81  
2.55  
-0.15  
2.44  
-0.77  
3.2  
-0.25  
-0.28



0.02  
-2.85  
-1.28  
3.01  
2.8  
-0.29  
0.02  
1.81  
-1.11  
-0.02  
-0.31  
0.65  
-2.64  
0.15  
1.28  
0.43  
0.15  
0.69  
-0.46  
0.12  
-1.42  
0.41  
3.68  
3.74  
2.05  
3.73  
-0.23  
-0.53  
2.36  
-0.57  
0.92  
3.46  
-0.9  
0.3  
1.3  
-2.05  
0.65  
0.93  
0.53  
-0.5  
1.98  
1.53  
5.23  
1.56  
0.35  
1.19  
-0.52  
1.26  
0.13  
1.79  
-0.33  
-0.1
