# Supplementary material
Source: PubMed Central journal article supplement (PMC5102067)
Supplement: NIHMS824783-supplement-Supp_1.pdf [file NIHMS824783-supplement-Supp_1.pdf]

## Table S1. n-PTEN peptides identified by LC-MS/MS

UniProt ID: P60484

Protein Description: Phosphatidylinositol 3,4,5-trisphosphate 3-phos

Coverage: 91.32%

# Unique peptides: 213

# PSMs: 588

| <u>Sequence</u>               | <u># PSMs</u> |
|-------------------------------|---------------|
| DKmFHFVWNTFFIPGPEETSEK        | 12            |
| ADNDKEYLVLTlTKNDLDKANK        | 2             |
| ADNDKEYLVLTlTKNDLDK           | 3             |
| TVEEPSNPEASSSTSVTPDVSDNEPDHYR | 7             |
| EDKFmYFEFPQPLPVcGDIKVEFFHK    | 1             |
| RYQEDGFDLDTYIYPNIIAmGFPAER    | 2             |
| NPEASSSTSVTPDVSDNEPDHYR       | 4             |
| HFWVNTFFIPGPEETSEK            | 2             |
| DLDTYIYPNIIAMGFPAER           | 4             |
| EPSNPEASSSTSVTPDVSDNEPDHYR    | 7             |
| VKIYSSNSGPTR                  | 2             |
| EPSNPEASSSTSVtPDVSDNEPDHYR    | 8             |
| STSVTPDVSDNEPDHYR             | 2             |
| LVLTlTKNDLDKANK               | 2             |
| ADNDKEYLVLTlTK                | 20            |
| MFHFVWNTFFIPGPEETSEK          | 8             |
| ADNDKEYLVLTlTKNDLDK           | 1             |
| KDKmFHFVWNTFFIPGPEETSEK       | 1             |
| NHLDYRPVALLFHK                | 25            |
| HLDYRPVALLFHK                 | 8             |
| REDKFmYFEFPQPLPVcGDIK         | 2             |
| DNDKEYLVLTlTK                 | 3             |
| SSTSVTPDVSDNEPDHYR            | 5             |
| cSDTTSDPENEPFDEDQHTQITK       | 1             |
| cEDLDQWLSEDDNHVAAIHcK         | 1             |
| DLDTYIYPNIIAmGFPAER           | 5             |
| DIKVEFFHKQNK                  | 2             |
| cSDTTSDPENEPFDEDQHTQITKV      | 2             |
| DKmFHFVWNTFFIPGPE             | 1             |
| DTTSDPENEPFDEDQHTQITKV        | 2             |
| DKkGVTIPSQR                   | 4             |
| FmYFEFPQPLPVcGDIK             | 3             |
| TVEEPSNPEASsSTSVTPDVSDNEPDHYR | 9             |
| TSVTPDVSDNEPDHYR              | 1             |
| DHNPPQLELIKPF                 | 3             |
| GDIKVEFFHKQNK                 | 1             |
| NDKEYLVLTlTK                  | 7             |
| EPFDEDQHTQITKV                | 3             |
| NDLDKANKdKANR                 | 2             |
| IKPFcEDLDQWLSEDDNHVAAIH       | 1             |
| RYVYYYSYLLK                   | 6             |
| TGVmIcAYLLHR                  | 1             |
| SVTPDVSDNEPDHYR               | 1             |

|                            |    |
|----------------------------|----|
| EPFDEDQHTQITK              | 5  |
| DTTSDPENEPFDEDQHTQITK      | 1  |
| cSDTTSDPENEPFDEDQHTQITkV   | 3  |
| LVLTLTKNDLKD               | 2  |
| DKMFHFVWNTFFIPGPEETSEK     | 3  |
| VAQYPFEDHNPPQLELIK         | 2  |
| DLDLTYIYPNIIAmGFPAERLEGVYR | 1  |
| DKmFHFVWNTFFIPGPEET        | 1  |
| YRPVALLFHK                 | 6  |
| GKFLKAQEAL                 | 1  |
| DKEYLVLTLTK                | 4  |
| GDIKVEFFHK                 | 9  |
| DEDQHTQITKV                | 2  |
| EDHNPPQLELIK               | 4  |
| YPFEDHNPPQLELIKPF          | 2  |
| RYQEDGFDLTLTYIYPN          | 2  |
| DIKVEFFHK                  | 7  |
| VKIYSSNSGPTRR              | 2  |
| NHLDYRPVALLFH              | 1  |
| DYRPVALLFHK                | 3  |
| IPGPEETSEKVENGLc           | 1  |
| EDKfMYFEFPQPLPVcGDIK       | 1  |
| DHNPPQLELIK                | 5  |
| AERLEGVYR                  | 3  |
| VSDNEPDHYR                 | 3  |
| VNTFFIPGPEETSEK            | 1  |
| IPGPEETSEKVE               | 1  |
| EDKfMYFEFPQPLPVcGDIK       | 1  |
| VAQYPFEDHNPPQLEL           | 2  |
| SSTSVtPDVSDNEPDHYR         | 2  |
| YIYPNIIAMGFPAER            | 1  |
| kkGVTIPSQR                 | 2  |
| TLTKNDLKDANK               | 1  |
| DGFDLTLTYIYPNIIAmGFPAER    | 4  |
| AQEALDFYGEVR               | 10 |
| NLDKANKDK                  | 2  |
| EDQHTQITKV                 | 2  |
| DEDQHTQITkV                | 4  |
| FWVNTFFIPGPEETSEK          | 1  |
| HYDTAKFNcR                 | 1  |
| NHLDYRPVALL                | 8  |
| DKKGVVTIPSQR               | 3  |
| WVNTFFIPGPEETSEK           | 1  |
| NHLDYRPVALLF               | 3  |
| DHNPPQLELIKPFc             | 2  |
| KGVTIPSQR                  | 4  |
| FDEDQHTQITkV               | 2  |
| NLDKANKDkANR               | 1  |
| MFHFVWNTFFIPGPEETS         | 1  |
| FPAERLEGVYR                | 4  |
| HYDTAkFNcR                 | 2  |
| IYSSNSGPTRR                | 3  |

|                           |   |
|---------------------------|---|
| NHLDYRPVAL                | 8 |
| DQEIDSIcSIER              | 2 |
| PENEPFDEDQHTQITkV         | 4 |
| YPNIIAmGFPAER             | 1 |
| DKmFHFVWNTF               | 3 |
| IYSSNSGPTR                | 4 |
| MFHFVWNTFFIPGPE           | 1 |
| NTFFIPGPEETSEK            | 1 |
| LYIYPNIIAmGFPAER          | 2 |
| NLDLKDANK                 | 1 |
| GPEETSEKVE                | 1 |
| LDLYIYPNIIAmGFPAER        | 2 |
| PAERLEGVYR                | 3 |
| GFPAERLEGVYR              | 3 |
| PGPEETSEK                 | 5 |
| EPFDEDQHTQITkV            | 1 |
| LTLTKNDLKD                | 1 |
| VAQYPFEDHNPPQ             | 4 |
| LVLTLTKND                 | 1 |
| VTLTKNDLKD                | 1 |
| ADNDKEYL                  | 5 |
| PVALLFHK                  | 1 |
| IYPNIIAmGFPAER            | 2 |
| IIkEIVSR                  | 2 |
| DEDQHTQITK                | 1 |
| RYQEDGFDDLTY              | 1 |
| NLDLkANKDK                | 1 |
| EALDFYGEVR                | 1 |
| NHLDYRPVA                 | 5 |
| DTTSDPENEPFDEDQHTQITkV    | 4 |
| VAQYPFEDHNPPQLE           | 1 |
| TFFIPGPEETSEK             | 2 |
| ADNDKEYLVLT               | 4 |
| EDHNPPQLEL                | 2 |
| YQEDGFDDLTYIYPNIIAmGFPAER | 2 |
| YPFEDHNPPQLEL             | 2 |
| YPFEDHNPPQ                | 2 |
| IYNLcAER                  | 3 |
| HYDTAK                    | 2 |
| YSSNSGPTR                 | 1 |
| LDYRPVALLFHK              | 3 |
| RYVYYYSY                  | 2 |
| ADNDKEYLV                 | 1 |
| YFSPNFKVK                 | 3 |
| EDHNPPQLELIKPF            | 1 |
| YIYPNIIAmGFPAER           | 3 |
| EkVENGSLe                 | 1 |
| TPDVSDNEPDHYR             | 1 |
| FEDHNPPQL                 | 1 |
| DSDPENEPFDEDQHTQITkV      | 2 |
| DPENEPFDEDQHTQITkV        | 1 |
| IPGPEETSEK                | 3 |

|                         |   |
|-------------------------|---|
| EDQHTQITkV              | 1 |
| KIYSSNSGPTR             | 1 |
| GVTIPSQRR               | 2 |
| VAQYPFEDHNPPQL          | 1 |
| KVEFFHK                 | 2 |
| DNEPDHYR                | 4 |
| YPFEDHNPPQLE            | 2 |
| FEDHNPPQ                | 2 |
| VAQYPFEDHN              | 1 |
| SGGTcNPQF               | 1 |
| NNIDDVVR                | 4 |
| EPSNPEASSSTS            | 1 |
| DHNPPQLELIKp            | 1 |
| DHNPPQLEL               | 3 |
| LELIKPFc                | 2 |
| FIPGPEETSEKVE           | 2 |
| HLDYRPVAL               | 2 |
| REDKFMYF                | 2 |
| YVYYYSYLLK              | 2 |
| YPFEDHNPPQL             | 2 |
| FFIPGPEETSEK            | 3 |
| EDLDQWLSE               | 1 |
| REDkFmYF                | 3 |
| LDYRPVALL               | 1 |
| EPFDEDQH                | 1 |
| RYQEDGFDDL              | 1 |
| LPVcGDIK                | 1 |
| NDKEYLVL                | 2 |
| NHLDYR                  | 1 |
| LDYRPVAL                | 1 |
| DKmFHFwVN               | 3 |
| YFSPNFK                 | 4 |
| EDHNPPQL                | 2 |
| LYIYPNIIAm              | 1 |
| IKVEFFHK                | 1 |
| REDKFmYF                | 4 |
| EYLVLTlTK               | 2 |
| DQHTQITkV               | 1 |
| IIKEIVSR                | 3 |
| GVTIPSQR                | 7 |
| IIAmGFPAER              | 3 |
| HKNHYK                  | 1 |
| LYIYPNIIAmG             | 1 |
| SDPENEPFDEDQHTQITkV     | 1 |
| EFPQPLPvCg              | 3 |
| NIIAmGFPAER             | 1 |
| FIPGPEETSEK             | 3 |
| YFSPNFkVK               | 2 |
| EDHNPPQLE               | 1 |
| EFPQPLPvC               | 1 |
| MFHFwVNTF               | 2 |
| SDTTDSPENEPFDEDQHTQITkV | 1 |

|                       |   |
|-----------------------|---|
| LDFYGEVR              | 1 |
| NHLDYRPV              | 1 |
| DGFDDLTYIYPN          | 1 |
| DLDLTYIYPNIIAmG       | 1 |
| IYSSNSGPTRRE          | 1 |
| LVLTLTK               | 2 |
| EPFDEDQHTQ            | 2 |
| RYVYYYS               | 2 |
| NHLDYRP               | 2 |
| VAQYPFE               | 1 |
| YSSNSGPTRR            | 1 |
| YPNIIAm               | 1 |
| IIAmGFPAERLEGVYR      | 1 |
| VAQYPFEDHNPPQLELIKPFc | 1 |
| DYRPVALL              | 1 |
| NDKEYLVLT             | 1 |
| LELIKPF               | 1 |
| DKmFHFVW              | 1 |
| DKmFHF                | 1 |
| KLYFTK                | 1 |
| LYFTkTVE              | 1 |
| YIYPNIIAm             | 1 |
| RYQEDGF               | 2 |
| DKmFHFVWNT            | 1 |
| REDKFmYFE             | 2 |
| DKmFHFVWNTFFIPGPEETS  | 1 |
| YYSYLLK               | 2 |
| DYRPVAL               | 1 |
| FSPNFKVK              | 1 |
| QYPFEDHNPPQ           | 1 |
| EPSNPEASSS            | 1 |
| FMYFEFPQPLPVcGDIK     | 1 |
| FSGGTcNPQF            | 1 |
| FPAERLE               | 1 |
| DIKVEFF               | 1 |

### 3 from the NEDD4-1 ubiquitylation experiment.

phatase and dual-specificity protein phosphatase PTEN OS=Homo sapiens GN=PTEN PE=1 SV=1 - [PTEN\_

| <u>Modifications</u>                      | <u>Xcorr score</u> | <u>Charge</u> | <u>MH+ [Da]</u> |
|-------------------------------------------|--------------------|---------------|-----------------|
| M3(Oxidation)                             | 6.58               | 3             | 2702.26389      |
|                                           | 6                  | 3             | 2521.32163      |
|                                           | 5.84               | 3             | 2208.14096      |
|                                           | 5.74               | 4             | 3146.36538      |
| M5(Oxidation); C16(Carbamidomethyl)       | 5.67               | 4             | 3263.56728      |
| M21(Oxidation)                            | 5.51               | 3             | 3223.54428      |
|                                           | 5.47               | 3             | 2504.08225      |
|                                           | 5.34               | 2             | 2165.04033      |
|                                           | 4.93               | 2             | 2312.16655      |
|                                           | 4.89               | 3             | 2817.21054      |
|                                           | 4.86               | 3             | 1308.68937      |
| T14(Phospho)                              | 4.82               | 3             | 2897.17875      |
|                                           | 4.82               | 3             | 1918.84256      |
|                                           | 4.8                | 3             | 1685.97873      |
|                                           | 4.8                | 2             | 1622.8676       |
|                                           | 4.74               | 3             | 2443.14365      |
| K14(GlyGly)                               | 4.68               | 3             | 2322.18143      |
| M4(Oxidation)                             | 4.65               | 3             | 2830.36411      |
|                                           | 4.65               | 4             | 1722.95156      |
|                                           | 4.63               | 3             | 1608.9058       |
| M6(Oxidation); C17(Carbamidomethyl)       | 4.62               | 4             | 2632.25942      |
|                                           | 4.59               | 2             | 1551.83013      |
|                                           | 4.58               | 2             | 2005.87358      |
| C1(Carbamidomethyl)                       | 4.55               | 3             | 2809.13944      |
| C1(Carbamidomethyl); C20(Carbamidomethyl) | 4.52               | 4             | 2555.09829      |
| M14(Oxidation)                            | 4.47               | 2             | 2328.16533      |
|                                           | 4.4                | 3             | 1532.82099      |
| C1(Carbamidomethyl)                       | 4.39               | 3             | 2908.21653      |
| M3(Oxidation)                             | 4.34               | 3             | 2128.00669      |
|                                           | 4.13               | 3             | 2661.13987      |
| K3(GlyGly)                                | 4.1                | 3             | 1342.74277      |
| M2(Oxidation); C13(Carbamidomethyl)       | 4.06               | 2             | 2104.00224      |
| S12(Phospho)                              | 4.05               | 3             | 3226.34287      |
|                                           | 4.02               | 3             | 1831.81217      |
|                                           | 4.01               | 3             | 1547.82383      |
|                                           | 4.01               | 3             | 1589.84342      |
|                                           | 3.98               | 2             | 1436.804        |
|                                           | 3.98               | 2             | 1686.79656      |
| K8(GlyGly)                                | 3.97               | 4             | 1615.81386      |
| C5(Carbamidomethyl)                       | 3.88               | 4             | 2752.27382      |
|                                           | 3.85               | 2             | 1530.80351      |
| M4(Oxidation); C6(Carbamidomethyl)        | 3.83               | 3             | 1449.73743      |
|                                           | 3.81               | 2             | 1730.7614       |

|                                     |      |   |            |
|-------------------------------------|------|---|------------|
|                                     | 3.78 | 2 | 1587.7282  |
|                                     | 3.78 | 3 | 2562.07651 |
| C1(Carbamidomethyl); K24(GlyGly)    | 3.77 | 3 | 3022.25095 |
|                                     | 3.76 | 3 | 1372.80283 |
|                                     | 3.75 | 4 | 2686.24624 |
|                                     | 3.74 | 3 | 2138.08536 |
| M14(Oxidation)                      | 3.74 | 3 | 3045.55094 |
| M3(Oxidation)                       | 3.72 | 3 | 2358.08896 |
|                                     | 3.71 | 3 | 1243.73124 |
|                                     | 3.69 | 2 | 1104.64275 |
|                                     | 3.67 | 2 | 1322.76042 |
|                                     | 3.65 | 3 | 1219.64664 |
|                                     | 3.65 | 2 | 1313.6281  |
|                                     | 3.6  | 3 | 1432.74469 |
|                                     | 3.59 | 3 | 2084.05973 |
|                                     | 3.58 | 2 | 2121.97075 |
|                                     | 3.58 | 3 | 1162.62915 |
|                                     | 3.58 | 3 | 1464.79364 |
|                                     | 3.57 | 3 | 1594.84897 |
|                                     | 3.53 | 3 | 1358.7601  |
| C17(Carbamidomethyl)                | 3.53 | 2 | 1845.85674 |
| M5(Oxidation); C16(Carbamidomethyl) | 3.53 | 3 | 2476.16471 |
|                                     | 3.51 | 2 | 1303.70195 |
|                                     | 3.51 | 3 | 1092.57676 |
|                                     | 3.49 | 2 | 1231.53264 |
|                                     | 3.46 | 2 | 1694.82976 |
|                                     | 3.44 | 2 | 1314.64116 |
| C16(Carbamidomethyl)                | 3.43 | 3 | 2460.17026 |
|                                     | 3.42 | 2 | 1896.92082 |
| T6(Phospho)                         | 3.4  | 2 | 2085.83208 |
|                                     | 3.4  | 2 | 1754.89507 |
| K1(Acetyl); K2(GlyGly)              | 3.39 | 3 | 1269.72699 |
|                                     | 3.38 | 3 | 1360.74149 |
| M17(Oxidation)                      | 3.35 | 3 | 2647.27622 |
|                                     | 3.32 | 2 | 1397.67253 |
|                                     | 3.32 | 3 | 1160.59055 |
|                                     | 3.26 | 2 | 1198.606   |
| K10(GlyGly)                         | 3.26 | 2 | 1427.67534 |
|                                     | 3.26 | 2 | 2027.97698 |
| C9(Carbamidomethyl)                 | 3.21 | 3 | 1311.58985 |
|                                     | 3.18 | 2 | 1310.72453 |
|                                     | 3.17 | 2 | 1228.7     |
|                                     | 3.16 | 2 | 1880.9063  |
|                                     | 3.15 | 3 | 1457.79306 |
| C14(Carbamidomethyl)                | 3.15 | 2 | 1707.85417 |
|                                     | 3.14 | 2 | 985.57836  |
| K11(GlyGly)                         | 3.12 | 2 | 1574.74309 |
| K8(GlyGly); K10(GlyGly)             | 3.11 | 4 | 1729.85671 |
|                                     | 3.11 | 2 | 2186.00517 |
|                                     | 3.07 | 2 | 1336.70232 |
| K6(GlyGly); C9(Carbamidomethyl)     | 3.06 | 3 | 1425.63398 |
|                                     | 3.05 | 3 | 1237.62842 |

|                                 |      |   |            |
|---------------------------------|------|---|------------|
|                                 | 3.02 | 2 | 1197.63713 |
| C8(Carbamidomethyl)             | 3.01 | 2 | 1464.66277 |
| K16(GlyGly)                     | 2.99 | 3 | 2140.97898 |
| M7(Oxidation)                   | 2.97 | 2 | 1494.7415  |
| M3(Oxidation)                   | 2.97 | 2 | 1487.6779  |
|                                 | 2.93 | 2 | 1081.52641 |
|                                 | 2.93 | 2 | 1868.88506 |
|                                 | 2.91 | 2 | 1595.76311 |
| M11(Oxidation)                  | 2.9  | 2 | 1985.02031 |
|                                 | 2.89 | 2 | 917.46849  |
|                                 | 2.87 | 2 | 1104.50432 |
| M13(Oxidation)                  | 2.87 | 2 | 2213.12358 |
|                                 | 2.87 | 2 | 1189.63335 |
|                                 | 2.86 | 2 | 1393.72038 |
|                                 | 2.85 | 2 | 973.44957  |
| K13(GlyGly)                     | 2.84 | 2 | 1800.84209 |
|                                 | 2.83 | 2 | 1160.65288 |
|                                 | 2.82 | 2 | 1541.7011  |
|                                 | 2.8  | 2 | 1016.60076 |
|                                 | 2.73 | 2 | 1259.72099 |
|                                 | 2.71 | 2 | 967.43712  |
|                                 | 2.71 | 2 | 924.56725  |
| M8(Oxidation)                   | 2.7  | 2 | 1607.82244 |
| K3(GlyGly)                      | 2.69 | 3 | 1071.64826 |
|                                 | 2.68 | 2 | 1214.56499 |
|                                 | 2.67 | 2 | 1634.7332  |
| K5(Acetyl)                      | 2.65 | 2 | 1202.60149 |
|                                 | 2.64 | 2 | 1198.57829 |
|                                 | 2.64 | 2 | 1084.55315 |
| K22(GlyGly)                     | 2.62 | 2 | 2775.18633 |
|                                 | 2.61 | 2 | 1783.83379 |
|                                 | 2.6  | 2 | 1481.7188  |
|                                 | 2.6  | 2 | 1280.63835 |
|                                 | 2.6  | 2 | 1191.56609 |
| M20(Oxidation)                  | 2.59 | 2 | 3067.45244 |
|                                 | 2.57 | 2 | 1598.74797 |
|                                 | 2.55 | 2 | 1243.54057 |
| C5(Carbamidomethyl)             | 2.55 | 2 | 1038.49785 |
|                                 | 2.54 | 2 | 734.34691  |
|                                 | 2.52 | 2 | 968.44249  |
|                                 | 2.52 | 2 | 1471.8449  |
|                                 | 2.5  | 2 | 1176.53728 |
|                                 | 2.49 | 2 | 1066.50481 |
|                                 | 2.48 | 2 | 1129.60503 |
|                                 | 2.48 | 2 | 1676.87187 |
| M9(Oxidation)                   | 2.46 | 2 | 1770.89311 |
| K2(GlyGly); C9(Carbamidomethyl) | 2.46 | 2 | 1149.52129 |
|                                 | 2.45 | 2 | 1544.65984 |
|                                 | 2.45 | 2 | 1096.50517 |
| K19(GlyGly)                     | 2.43 | 2 | 2458.06743 |
| K17(GlyGly)                     | 2.42 | 2 | 2256.02007 |
|                                 | 2.42 | 2 | 1086.53057 |



|                           |                     |      |            |
|---------------------------|---------------------|------|------------|
| K9(GlyGly)                | 2.42                | 2    | 1312.6508  |
|                           | 2.41                | 2    | 1209.622   |
|                           | 2.41                | 2    | 1013.58574 |
|                           | 2.4                 | 2    | 1654.78887 |
|                           | 2.39                | 2    | 934.515    |
|                           | 2.39                | 2    | 1045.43315 |
|                           | 2.38                | 2    | 1485.66338 |
|                           | 2.36                | 2    | 983.4232   |
|                           | 2.35                | 2    | 1219.53862 |
|                           | C5(Carbamidomethyl) | 2.32 | 2          |
| 2.32                      |                     | 2    | 944.48125  |
| 2.31                      |                     | 2    | 1192.49529 |
| 2.31                      |                     | 3    | 1400.75653 |
| 2.27                      |                     | 2    | 1062.52263 |
| C8(Carbamidomethyl)       | 2.27                | 2    | 1019.55516 |
|                           | 2.27                | 2    | 1461.71025 |
|                           | 2.26                | 2    | 1083.59465 |
|                           | 2.26                | 2    | 1135.52788 |
|                           | 2.26                | 2    | 1374.69805 |
|                           | 2.25                | 2    | 1356.62456 |
|                           | 2.25                | 2    | 1380.67021 |
| K4(GlyGly); M6(Oxidation) | 2.21                | 2    | 1134.49883 |
|                           | 2.21                | 2    | 1265.56658 |
|                           | 2.2                 | 2    | 1059.61833 |
|                           | 2.18                | 2    | 1016.39562 |
|                           | 2.18                | 2    | 1257.53826 |
| C4(Carbamidomethyl)       | 2.18                | 2    | 901.48149  |
|                           | 2.14                | 2    | 993.52916  |
|                           | 2.13                | 2    | 817.39507  |
|                           | 2.12                | 2    | 946.53685  |
| M3(Oxidation)             | 2.1                 | 3    | 1239.56229 |
|                           | 2.1                 | 2    | 902.44188  |
| M11(Oxidation)            | 2.09                | 2    | 949.43761  |
|                           | 2.09                | 2    | 1327.69853 |
|                           | 2.09                | 2    | 1047.59905 |
| M6(Oxidation)             | 2.09                | 3    | 1151.52436 |
|                           | 2.09                | 2    | 1079.63591 |
| K8(GlyGly)                | 2.06                | 2    | 1183.60222 |
|                           | 2.05                | 2    | 957.60729  |
|                           | 2.04                | 2    | 857.48198  |
| M4(Oxidation)             | 2.03                | 2    | 1120.58159 |
|                           | 2.02                | 2    | 826.43187  |
| M11(Oxidation)            | 2.01                | 2    | 1384.72002 |
| K18(GlyGly)               | 2.01                | 3    | 2343.03971 |
| C9(Carbamidomethyl)       | 2.01                | 2    | 1143.55022 |
| M5(Oxidation)             | 2                   | 2    | 1234.62822 |
|                           | 1.99                | 2    | 1233.60271 |
| K7(GlyGly)                | 1.99                | 2    | 1243.64946 |
|                           | 1.99                | 2    | 1078.47746 |
| C9(Carbamidomethyl)       | 1.98                | 2    | 1086.52495 |
|                           | 1.98                | 2    | 1228.56108 |
| K23(GlyGly)               | 1.98                | 3    | 2862.21402 |

|                      |      |   |            |
|----------------------|------|---|------------|
|                      | 1.98 | 2 | 998.4959   |
|                      | 1.97 | 2 | 1013.51592 |
|                      | 1.96 | 2 | 1545.71282 |
| M14(Oxidation)       | 1.96 | 3 | 1727.85898 |
|                      | 1.95 | 3 | 1366.67182 |
|                      | 1.95 | 2 | 787.52959  |
|                      | 1.95 | 2 | 1245.50005 |
|                      | 1.95 | 2 | 1013.47276 |
|                      | 1.94 | 2 | 914.44652  |
|                      | 1.94 | 2 | 853.40978  |
|                      | 1.91 | 2 | 1124.54424 |
| M7(Oxidation)        | 1.9  | 2 | 837.4193   |
| M4(Oxidation)        | 1.9  | 3 | 1837.96598 |
| C21(Carbamidomethyl) | 1.89 | 3 | 2542.25388 |
|                      | 1.88 | 2 | 946.53728  |
|                      | 1.88 | 2 | 1094.57305 |
|                      | 1.88 | 2 | 859.52751  |
| M3(Oxidation)        | 1.87 | 2 | 1026.45281 |
| M3(Oxidation)        | 1.87 | 2 | 840.37071  |
|                      | 1.86 | 2 | 799.4699   |
| K5(GlyGly)           | 1.83 | 2 | 1114.57964 |
| M9(Oxidation)        | 1.83 | 2 | 1113.5645  |
|                      | 1.83 | 2 | 914.40105  |
| M3(Oxidation)        | 1.83 | 2 | 1340.61296 |
| M6(Oxidation)        | 1.83 | 2 | 1280.56243 |
| M3(Oxidation)        | 1.82 | 2 | 2445.13628 |
|                      | 1.82 | 2 | 949.50389  |
|                      | 1.81 | 2 | 833.45531  |
|                      | 1.8  | 2 | 966.53752  |
|                      | 1.79 | 2 | 1371.59624 |
|                      | 1.76 | 2 | 1004.41686 |
| C13(Carbamidomethyl) | 1.76 | 2 | 2087.99419 |
| C6(Carbamidomethyl)  | 1.76 | 2 | 1114.46367 |
|                      | 1.75 | 2 | 861.4475   |
|                      | 1.75 | 2 | 897.47362  |

\_HUMAN]

**$\Delta M$  [ppm]**

1.56  
2.81  
0.66  
-0.51  
2.79  
1.14  
0.55  
2.96  
1.44  
0.8  
-1.01  
1.43  
0.61  
-0.57  
2.44  
0.33  
-0.43  
3.34  
4.45  
3  
0.7  
2.32  
0.08  
0.57  
2.2  
3.09  
-0.69  
3.54  
3.24  
-1.39  
-0.77  
4.9  
2.96  
1.53  
1.36  
-0.07  
3.08  
-0.28  
-0.55  
2.38  
2.87  
2.26  
-0.17

-0.25  
0.53  
0.59  
-1.34  
-6.9  
-2.99  
3.87  
-0.47  
0.16  
1.37  
2.86  
-0.33  
-3.91  
1.09  
5.23  
-2.68  
3.08  
1.26  
0.03  
1.56  
1.71  
3.33  
1.09  
-2.68  
-0.98  
1.47  
-0.96  
3.55  
4.27  
-3.68  
0.89  
-0.33  
-1.21  
0.47  
2.08  
-0.09  
-0.23  
-0.57  
0.97  
-0.05  
2.25  
-0.71  
-0.16  
2.09  
1.05  
-0.6  
-0.95  
-0.56  
-0.04  
1.08  
0.8  
0.01

-0.32  
-0.54  
0.34  
0.31  
0.14  
-0.81  
1.12  
2.67  
0.07  
-0.26  
-1.14  
-3.44  
0.75  
-1.4  
2.3  
1.19  
0.6  
-0.57  
2.04  
0.31  
0.38  
0.71  
-1.66  
-3.6  
0.15  
-0.09  
0.23  
3.64  
-0.28  
-0.06  
2.88  
1.94  
1.12  
1.68  
4.22  
-0.39  
2.18  
-5.66  
0.16  
-0.75  
1.93  
1.08  
-0.34  
0.83  
4.5  
2.65  
0.67  
-0.91  
-0.61  
1.32  
6.59  
-0.77

1.22  
-0.22  
0.63  
1.7  
0.48  
-0.23  
-0.78  
1.46  
0.62  
1.45  
1.71  
-0.98  
2.31  
1.07  
-4.22  
-0.4  
0.06  
3.29  
0.03  
1.94  
1.43  
3.36  
3.63  
-1.34  
0  
-0.01  
0.31  
4.02  
-0.09  
1.24  
0.56  
1.31  
0.2  
1.4  
0.41  
4.6  
1.1  
-3.71  
-1.99  
-2.33  
-0.38  
0.02  
1.35  
1.06  
-0.13  
2.65  
2.34  
1.96  
-2.37  
-3.63  
0.18  
-1.57

1.69  
-0.41  
1.3  
1.66  
0.59  
1  
-1.47  
0.07  
-1.52  
0.83  
-0.09  
2.1  
1.61  
4.04  
1.69  
0.18  
-1.51  
2.49  
-0.25  
-1.72  
1.53  
-0.38  
0.82  
2.75  
0.6  
5.8  
1  
4.44  
-3.36  
-0.15  
0.1  
-1.35  
1.26  
1.11  
2.15
